# Supplementary material
Source: PubMed Central journal article supplement (PMC6718433)
Supplement: 10.1194_M094508_jlr.M094508-1.pdf [file 10.1194_M094508_jlr.M094508-1.pdf]

## Supplemental data Adipose aP2-hFXR

### Supplemental Figure S1

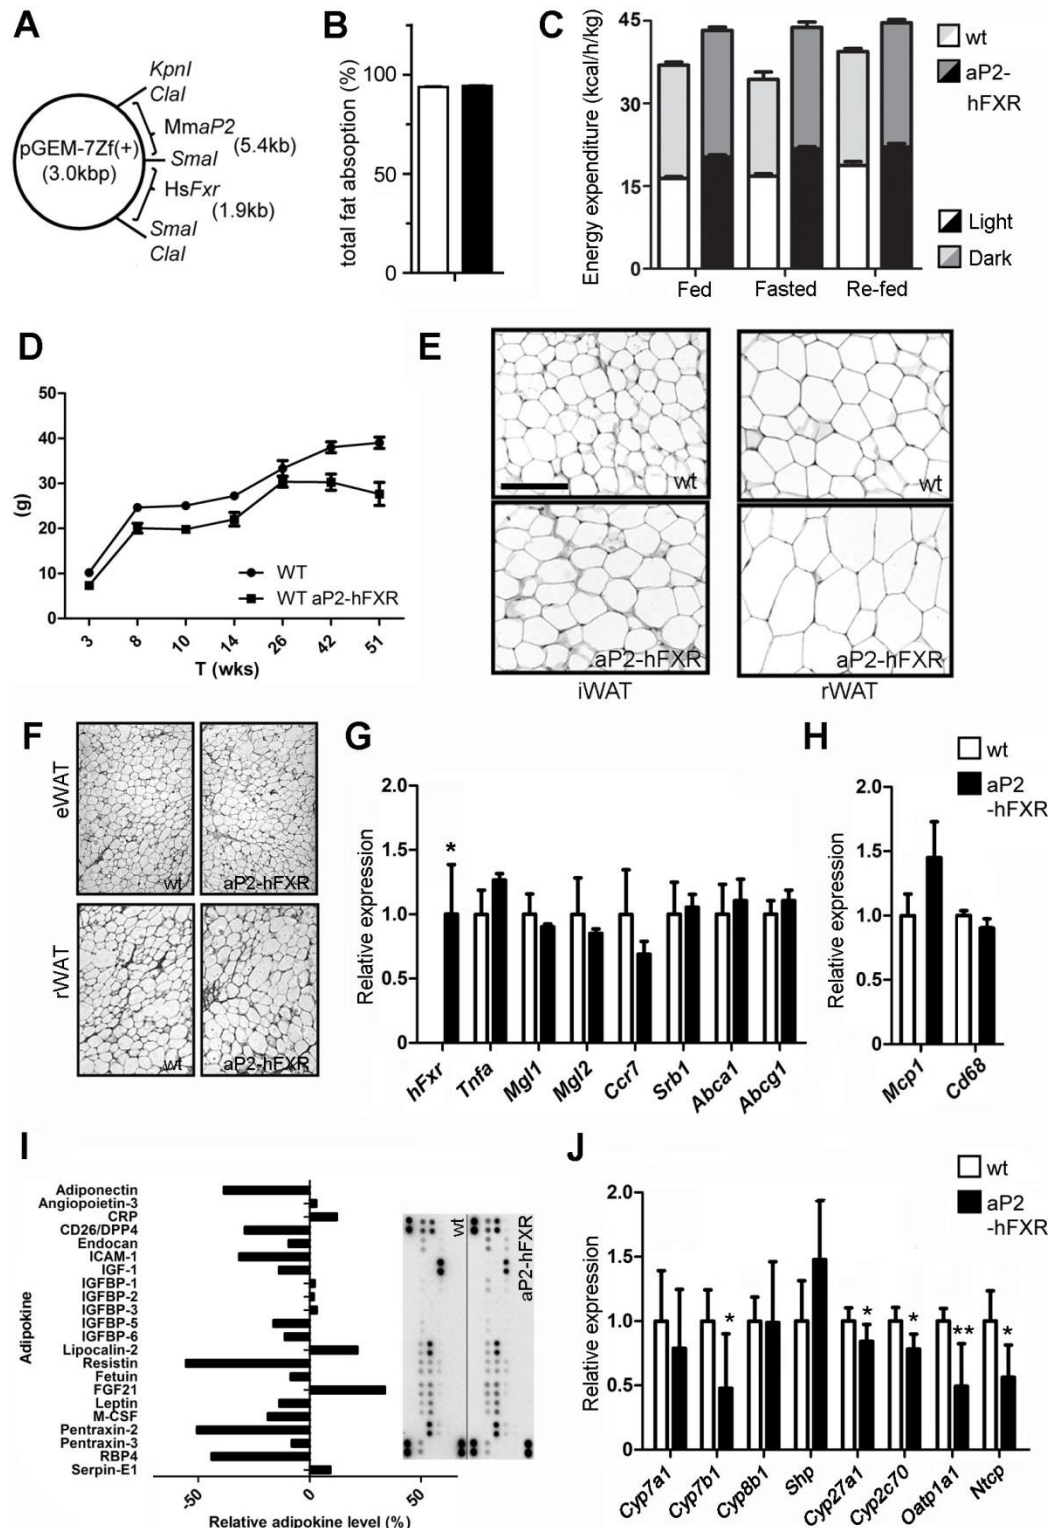

**Figure S1** (A) Transgene construct of the human FXR $\alpha$ 2 (NR1H4) ligated to the mouse aP2 (Fabp4) promoter (aP2-hFXR) that was microinjected. (B) Dietary fat absorption and (C) energy expenditure normalized to body weight of chow-fed wild type and aP2-hFXR mice. (D) Body weight development of chow-fed aP2-hFXR compared to wild type controls over time. (E) H&E-stained morphology of retroperitoneal and inguinal WAT (rWAT, iWAT). (F) H&E stained morphology in eWAT and rWAT of 3-week old mice. Relative expression levels of inflammatory markers and FXR targets in (G) isolated macrophages and (H) eWAT of chow-fed aP2-hFXR compared to wild type controls. (I) Plasma adipokines in pooled plasma and adipokine array dotblot of aP2-hFXR mice compared to wild type and (J) Hepatic bile acid synthesis genes. Bar represents 100 $\mu$ m. N=6-8/group, G: N=4, data are represented as mean  $\pm$  SEM, \*p<0.05.

Supplemental Figure S2

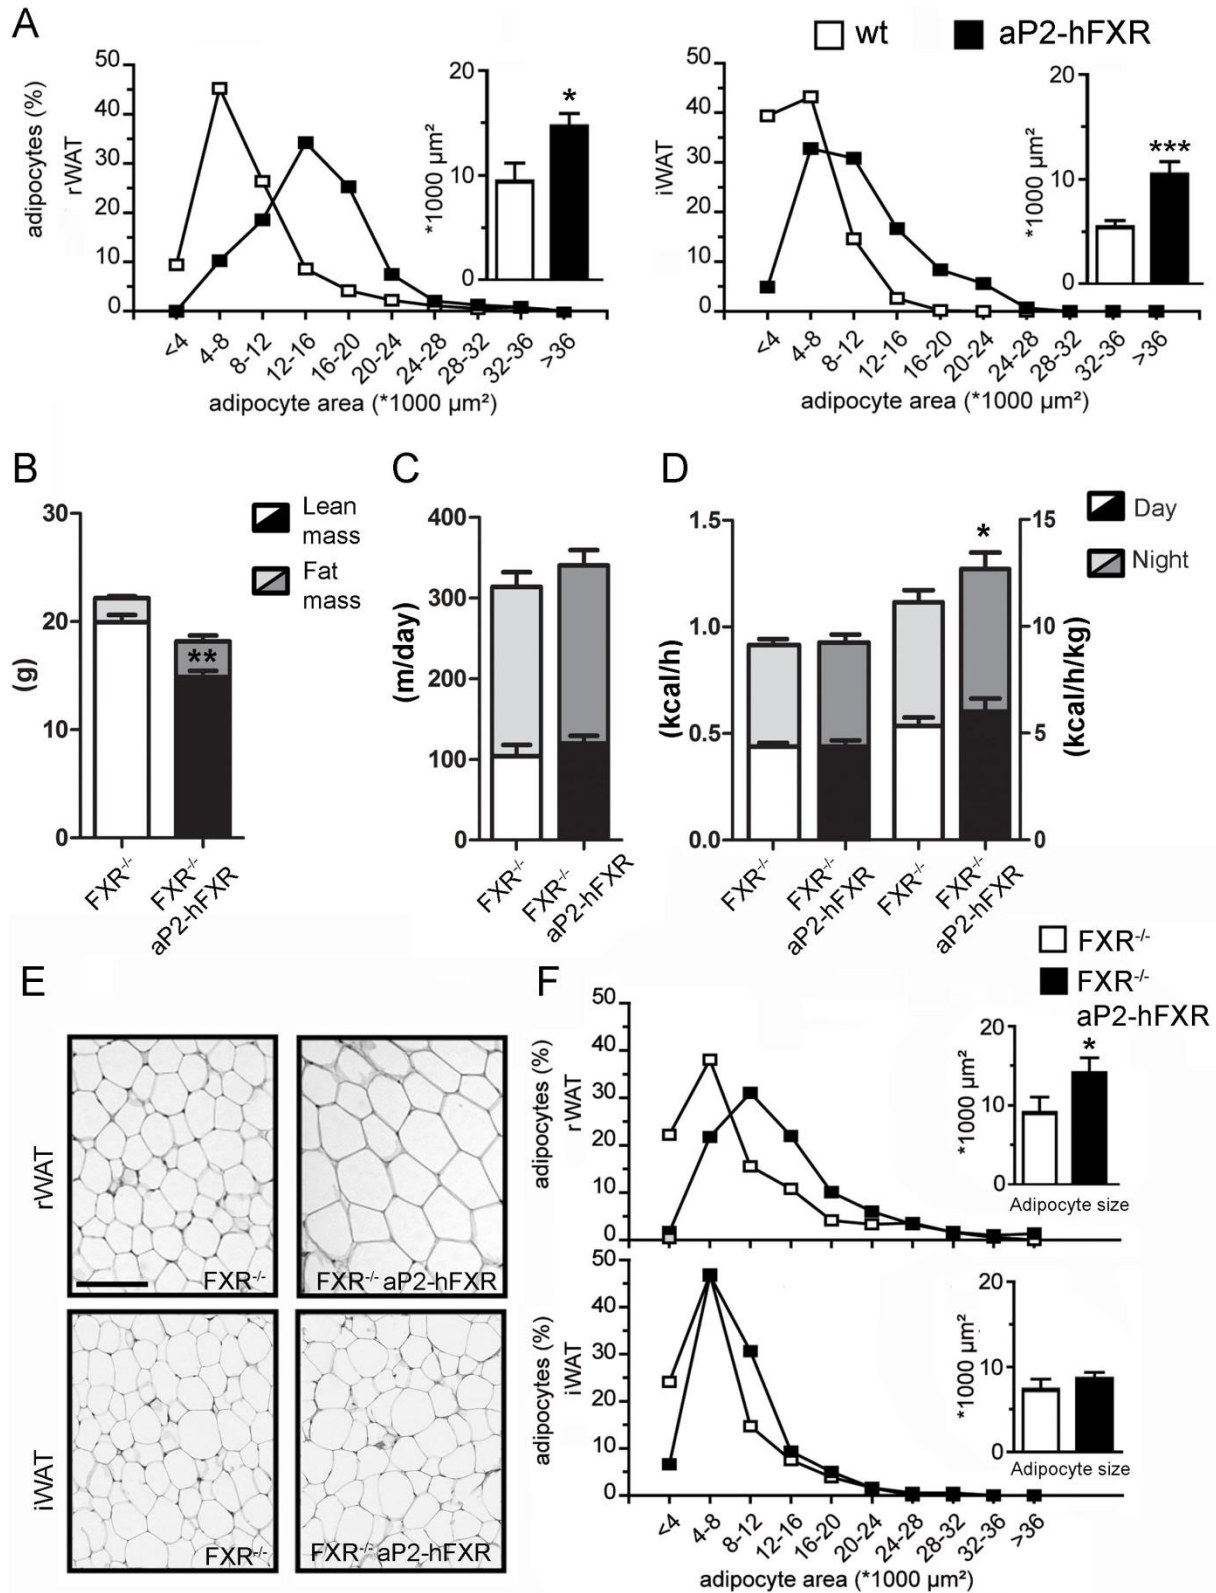

**Figure S2** (A) rWAT and iWAT size distribution and average adipocyte size in chow-fed wild type and aP2-hFXR mice. (B) Fat and lean mass, (C) locomotor activity and (D) energy expenditure (unadjusted and adjusted for body weight) of chow-fed  $\text{FXR}^{-/-}$  and  $\text{FXR}^{-/-}$  aP2-hFXR mice. (E) rWAT and iWAT H&E-stained morphology in  $\text{FXR}^{-/-}$  and  $\text{FXR}^{-/-}$  aP2-hFXR mice and (F) Distribution and average adipocyte size.  $N=6-8/\text{group}$ , data are represented as mean  $\pm$  SEM, \* $p<0.05$ , \*\* $p<0.01$ , \*\*\* $p<0.001$ . Bar represents 100 $\mu\text{m}$ .

**Supplemental Figure S3**

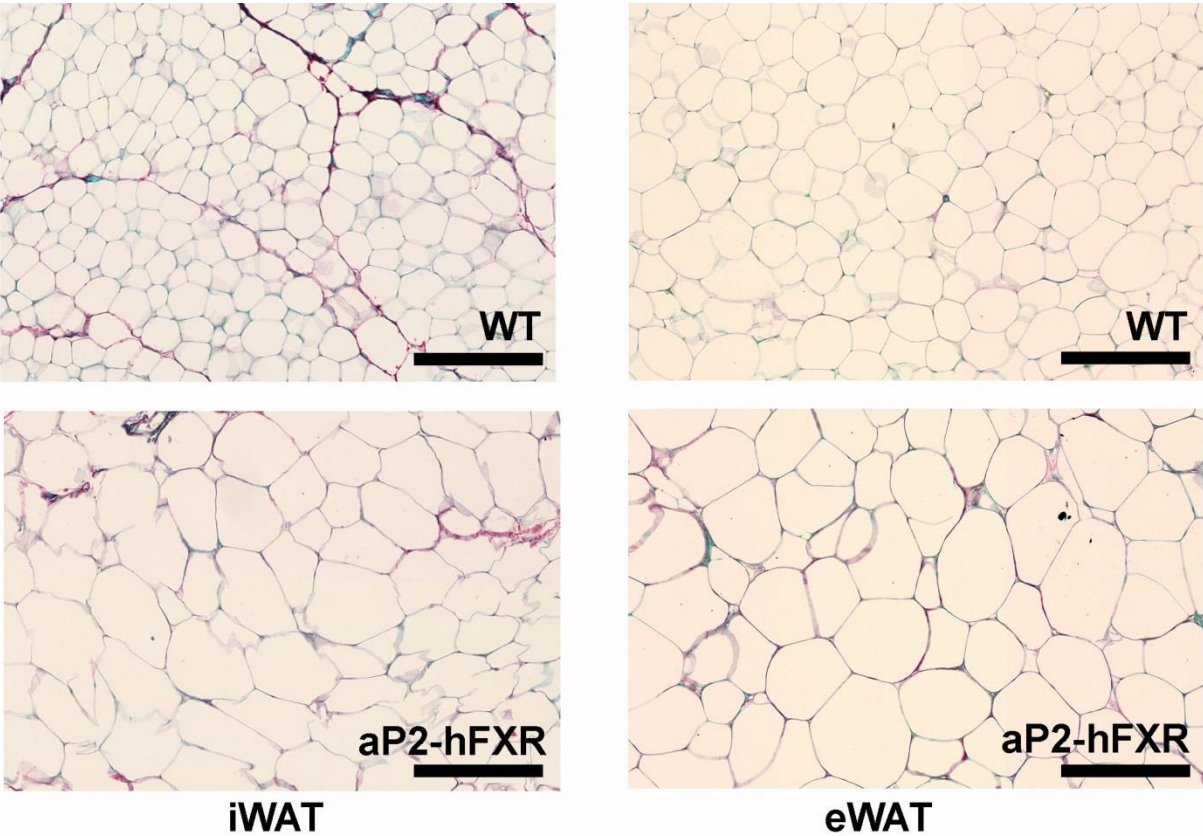

**Figure S3** Collagen characterization in iWAT and eWAT of chow-fed wild type and aP2-hFXR mice by picrosirius red staining, showing disorganized tissue architecture in iWAT and pericellular fibrosis in eWAT. Bar represents 200µm.

## Supplemental Figure S4

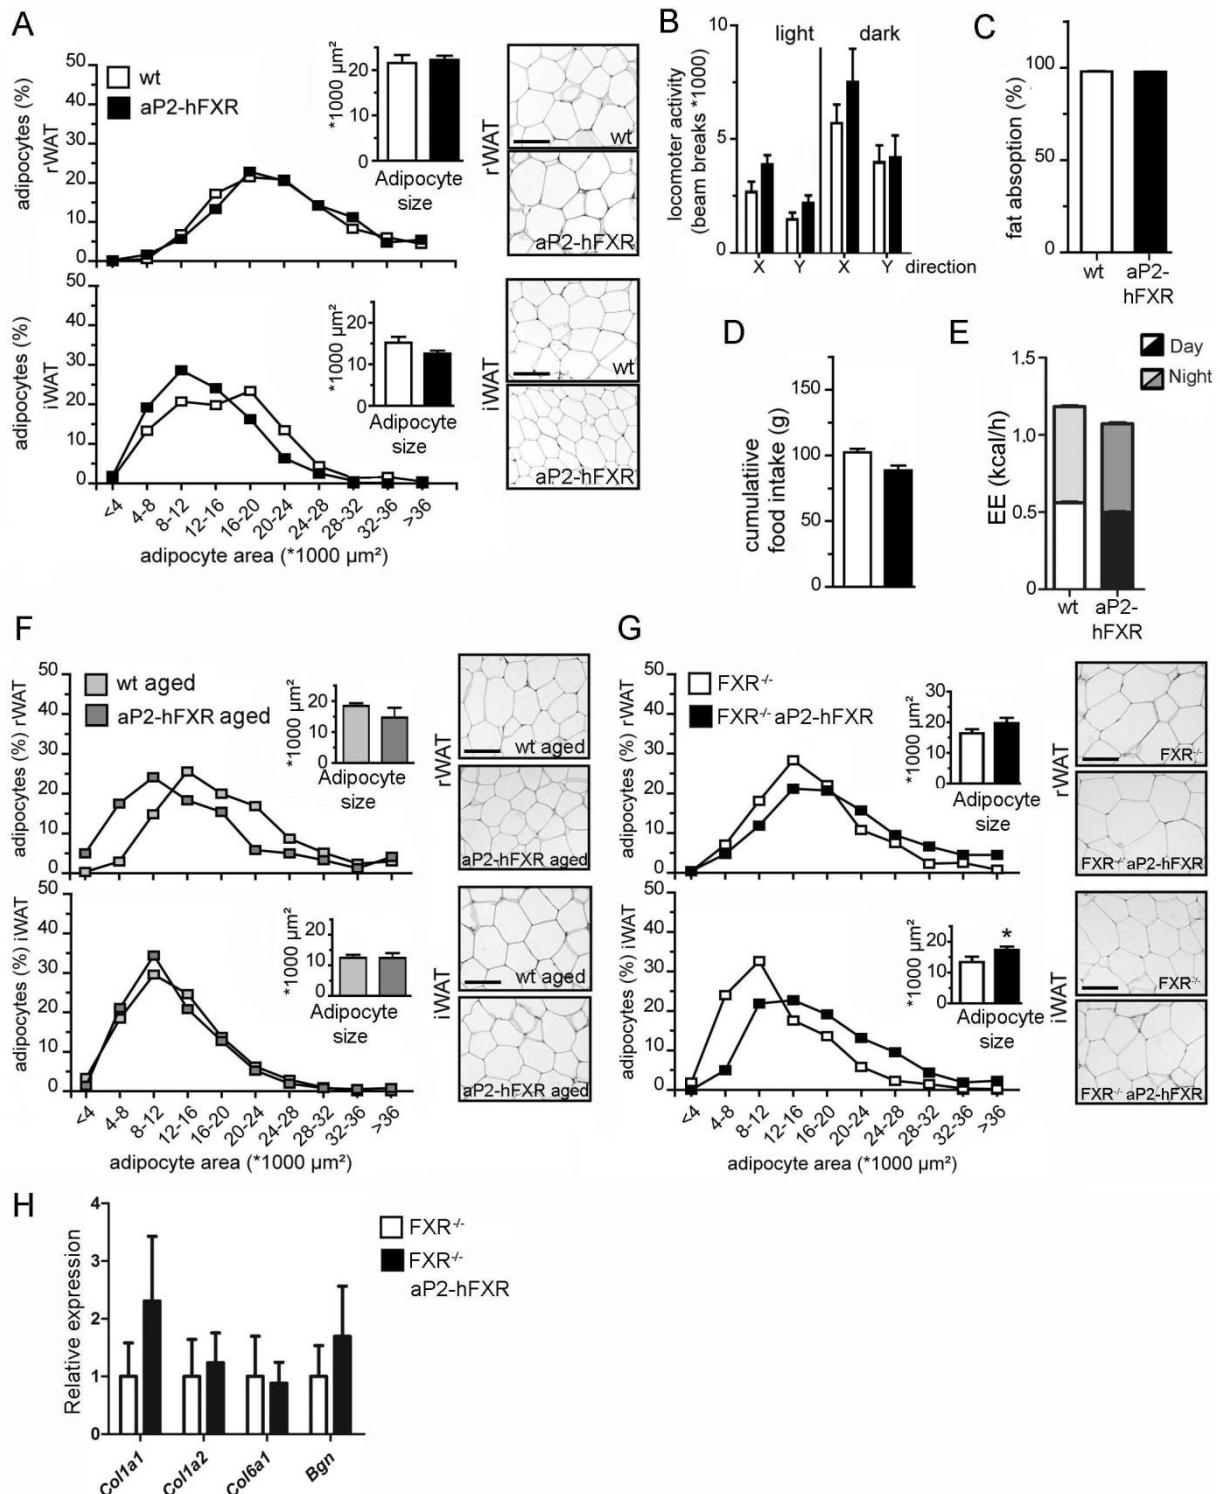

**Figure S4** (A) Size distribution, average size and H&E-stained morphology of adipocytes in rWAT and iWAT of wild type and aP2-hFXR mice after 6 weeks HFD. (B) Locomotor activity, (C) Fat absorption, (D) 6-week cumulative food intake and (E) Energy expenditure after 6 weeks HFD. (F) Size distribution, average adipocyte size and H&E stained morphology in rWAT and iWAT of aged wild type and aP2-hFXR mice and (G) rWAT and iWAT of FXR<sup>-/-</sup> and FXR<sup>-/-</sup> aP2-hFXR mice fed a HFD for 6 weeks. (I) ECM gene expression in eWAT of 13 weeks HFD-fed FXR<sup>-/-</sup> and FXR<sup>-/-</sup> aP2-hFXR mice. N=6-8/group, data are represented as mean  $\pm$  SEM, \*p<0.05. Bar represents 100 $\mu\text{m}$ .

## Supplemental Figure S5

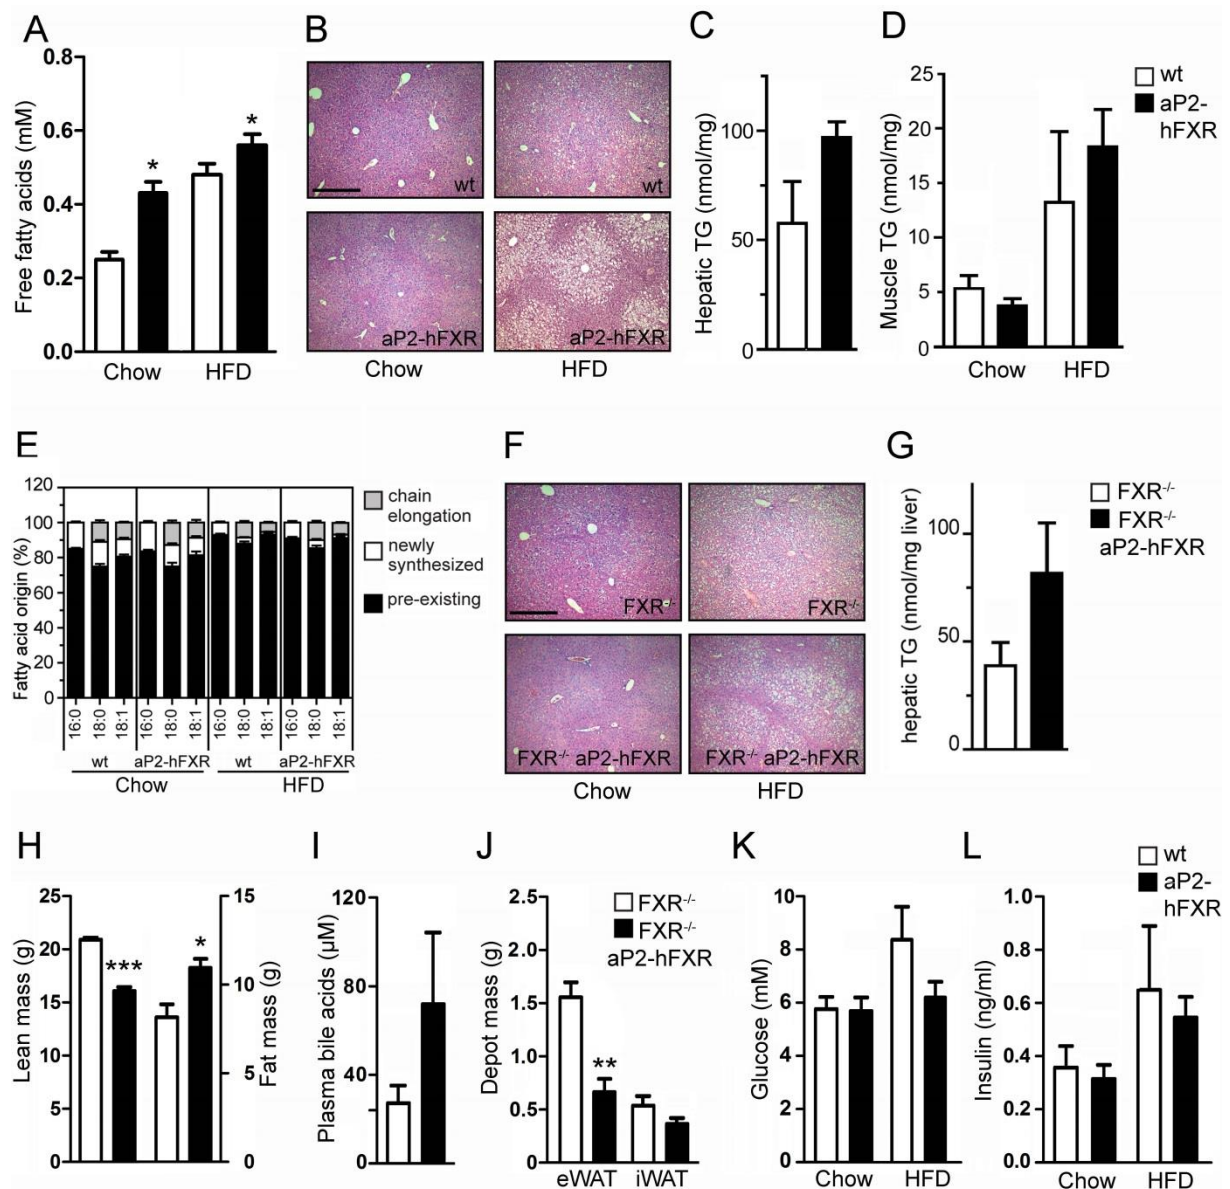

**Figure S5** (A) Plasma free fatty acids in chow-fed wild type and aP2-hFXR mice and after 6 weeks on high-fat diet. (B) Liver histology (H&E) in chow-fed wild type and aP2-hFXR mice and after 6 weeks on high-fat diet. (C) Hepatic triglycerides in wild type and aP2-hFXR mice after 6 weeks high-fat diet. (D) Muscle triglycerides in wild type and aP2-hFXR chow-fed mice and after 6 weeks high-fat diet. (E) Origin of C16 and C18 hepatic fatty acids in aP2-hFXR in chow-fed mice and after 6 weeks high-fat diet. (F) Liver histology (H&E) in chow-fed FXR<sup>-/-</sup> and FXR<sup>-/-</sup> aP2-hFXR mice and after 6 weeks high-fat diet. (G) Hepatic triglycerides in 6 weeks HFD-fed FXR<sup>-/-</sup> and FXR<sup>-/-</sup> aP2-hFXR mice. (H) Lean and fat mass (as also depicted in Figure 6B), (I) plasma bile acids concentrations and (J) adipose depot weight in FXR<sup>-/-</sup> and FXR<sup>-/-</sup> aP2-hFXR mice after 3 months high-fat diet. (K) Glucose and (L) insulin levels of chow-fed wild type and aP2-hFXR mice after 6 weeks high-fat diet. N=6-8/group, data are represented as mean  $\pm$  SEM, \* $p$ <0.05, \*\* $p$ <0.01, \*\*\* $p$ <0.001. Bar represents 200  $\mu$ m.

**Supplemental Table S1** Differentially expressed extracellular matrix-associated genes in eWAT of aP2-hFXR mice.

| Gene name       | Fold change | Gene name      | Fold change |
|-----------------|-------------|----------------|-------------|
| <i>Adam19</i>   | 1,17        | <i>Mfap5</i>   | 1,50        |
| <i>Adamts15</i> | 1,37        | <i>Mmp12</i>   | 2,07        |
| <i>Adamts2</i>  | 1,67        | <i>Mmp19</i>   | 1,16        |
| <i>Adamts5</i>  | 1,33        | <i>Mmp2</i>    | 1,88        |
| <i>Adamtsl2</i> | 1,45        | <i>Mmp23</i>   | 1,12        |
| <i>Ang</i>      | 1,34        | <i>Mmp9</i>    | -1,46       |
| <i>Anxa2</i>    | 1,46        | <i>Ncan</i>    | 1,22        |
| <i>Bgn</i>      | 2,01        | <i>Nid2</i>    | 1,20        |
| <i>Cilp</i>     | 2,96        | <i>Ntn1</i>    | 1,18        |
| <i>Col12a1</i>  | 1,30        | <i>Olfml2b</i> | 1,59        |
| <i>Col15a1</i>  | 1,58        | <i>Podn</i>    | -1,35       |
| <i>Col16a1</i>  | 1,11        | <i>Prelp</i>   | 1,57        |
| <i>Col1a1</i>   | 1,80        | <i>Slc1a3</i>  | -1,86       |
| <i>Col1a2</i>   | 1,59        | <i>Smoc1</i>   | -1,25       |
| <i>Col3a1</i>   | 1,46        | <i>Smoc2</i>   | 1,27        |
| <i>Col4a1</i>   | 1,36        | <i>Sparc</i>   | 1,35        |
| <i>Col4a2</i>   | 1,49        | <i>Spon1</i>   | 1,43        |
| <i>Col4a5</i>   | 1,17        | <i>Tgfb3</i>   | 1,33        |
| <i>Col5a1</i>   | 1,31        | <i>Tgfb1</i>   | 1,33        |
| <i>Col6a1</i>   | 1,86        | <i>Timp1</i>   | 1,18        |
| <i>Col6a2</i>   | 1,85        | <i>Tnc</i>     | -1,16       |
| <i>Col8a1</i>   | 1,32        | <i>Tnxb</i>    | 1,44        |
| <i>Crispld2</i> | 1,22        | <i>Vcan</i>    | 1,59        |
| <i>Crtac1</i>   | 1,42        | <i>Wnt5a</i>   | 1,18        |
| <i>Ctgf</i>     | 1,35        |                |             |
| <i>Ecm1</i>     | 1,51        |                |             |
| <i>Efemp2</i>   | 1,13        |                |             |
| <i>Egflam</i>   | 1,11        |                |             |
| <i>Eln</i>      | 2,99        |                |             |
| <i>Emilin1</i>  | 1,18        |                |             |
| <i>Entpd2</i>   | 1,21        |                |             |
| <i>Fbln1</i>    | 1,51        |                |             |
| <i>Fbln2</i>    | 1,91        |                |             |
| <i>Fbn1</i>     | 1,67        |                |             |
| <i>Gpc1</i>     | 1,33        |                |             |
| <i>Gpc3</i>     | 1,25        |                |             |
| <i>Gpc4</i>     | 1,21        |                |             |
| <i>Hsd17b12</i> | 1,21        |                |             |
| <i>Hspg2</i>    | 1,31        |                |             |
| <i>Lama2</i>    | 1,30        |                |             |
| <i>Lamb2</i>    | 1,19        |                |             |
| <i>Lamc1</i>    | 1,25        |                |             |
| <i>Lepre1</i>   | 1,17        |                |             |
| <i>Lgals1</i>   | 1,17        |                |             |
| <i>Lgals3</i>   | 1,46        |                |             |
| <i>Lox</i>      | 1,56        |                |             |
| <i>Loxl1</i>    | 1,45        |                |             |
| <i>Ltp1</i>     | 1,22        |                |             |
| <i>Ltpb4</i>    | 1,55        |                |             |
| <i>Lum</i>      | 1,71        |                |             |
| <i>Matn2</i>    | 1,59        |                |             |
| <i>Mfap2</i>    | 1,31        |                |             |
| <i>Mfap4</i>    | 2,26        |                |             |

**Supplemental Table S2** Differential expression of CEBP $\alpha$ , PPAR $\gamma$  and WNT pathway genes

| Gene name                 | Fold change | Gene name                 | Fold change |
|---------------------------|-------------|---------------------------|-------------|
| <u>Regulators</u>         |             | <u>Pparg target genes</u> |             |
| <i>CEBPa</i>              | -1,33       | <i>Slc5a6</i>             | -1,26       |
| <i>Pparg</i>              | -1,26       | <i>Gys1</i>               | -1,31       |
|                           |             | <i>Cited2</i>             | -1,35       |
| <u>Pparg target genes</u> |             | <i>Prodh</i>              | -1,36       |
| <i>Lep</i>                | 2,54        | <i>Amotl2</i>             | -1,37       |
| <i>Lcn2</i>               | 2,36        | <i>Pim3</i>               | -1,38       |
| <i>Acta2</i>              | 1,89        | <i>Slc27a1</i>            | -1,40       |
| <i>Col1a1</i>             | 1,80        | <i>Mmp9</i>               | -1,46       |
| <i>Vcan</i>               | 1,59        | <i>Thbd</i>               | -1,52       |
| <i>Col1a2</i>             | 1,59        | <i>Cfd</i>                | -1,62       |
| <i>Aldh1a7</i>            | 1,58        |                           |             |
| <i>Col3a1</i>             | 1,46        | <u>Wnt pathway</u>        |             |
| <i>Anxa1</i>              | 1,44        | <i>Sfrp5</i>              | 2,65        |
| <i>Fhl1</i>               | 1,43        | <i>Sfrp1</i>              | 2,01        |
| <i>Hmgcs1</i>             | 1,43        | <i>Ccnd2</i>              | 1,26        |
| <i>Ephx1</i>              | 1,42        | <i>Nkd1</i>               | 1,25        |
| <i>Ctss</i>               | 1,41        | <i>Ppp2r5b</i>            | 1,24        |
| <i>Vldlr</i>              | 1,40        | <i>Cacybp</i>             | 1,18        |
| <i>Cx3cr1</i>             | 1,40        | <i>Wnt5a</i>              | 1,18        |
| <i>Atp2a3</i>             | 1,39        | <i>Sox17</i>              | -1,16       |
| <i>Me1</i>                | 1,37        | <i>Myc</i>                | -1,2        |
| <i>Plin2</i>              | 1,30        | <i>Ppp2r1b</i>            | -1,22       |
| <i>Vcam1</i>              | 1,29        | <i>Tcf7l2</i>             | -1,29       |
| <i>Pkm</i>                | 1,22        |                           |             |
| <i>Lpl</i>                | 1,22        |                           |             |
| <i>Calr</i>               | 1,20        |                           |             |
| <i>Lrp1</i>               | 1,20        |                           |             |
| <i>Boc</i>                | 1,19        |                           |             |
| <i>Arntl</i>              | 1,17        |                           |             |
| <i>Ccne1</i>              | 1,13        |                           |             |
| <i>Has2</i>               | 1,13        |                           |             |
| <i>Fam57b</i>             | 1,10        |                           |             |
| <i>Bace1</i>              | 1,10        |                           |             |
| <i>Zfp236</i>             | -1,11       |                           |             |
| <i>Klf11</i>              | -1,11       |                           |             |
| <i>Adcy6</i>              | -1,13       |                           |             |
| <i>Pdpr</i>               | -1,13       |                           |             |
| <i>Cpt2</i>               | -1,14       |                           |             |
| <i>Chst11</i>             | -1,15       |                           |             |
| <i>Slc16a10</i>           | -1,16       |                           |             |
| <i>Adora2a</i>            | -1,17       |                           |             |
| <i>Nfkbia</i>             | -1,17       |                           |             |
| <i>Kank3</i>              | -1,18       |                           |             |
| <i>Ffar2</i>              | -1,18       |                           |             |
| <i>Nampt</i>              | -1,19       |                           |             |
| <i>Pik3r1</i>             | -1,20       |                           |             |
| <i>Ednra</i>              | -1,20       |                           |             |
| <i>Akap1</i>              | -1,21       |                           |             |
| <i>Abca1</i>              | -1,21       |                           |             |
| <i>Tmem143</i>            | -1,21       |                           |             |
| <i>Angptl2</i>            | -1,22       |                           |             |
| <i>Plin1</i>              | -1,22       |                           |             |
| <i>Hk2</i>                | -1,23       |                           |             |

**Supplemental Table S3** Differentially secreted proteins between isolated eWAT of adipocyte-specific FXR overexpressing mice and controls.

| Accession no.                  | Gene name      | Protein name                                          | Fold change |
|--------------------------------|----------------|-------------------------------------------------------|-------------|
| <b>Increased protein level</b> |                |                                                       |             |
| P55284                         | <i>Cdh5</i>    | Cadherin-5                                            | 1.73        |
| P18760                         | <i>Cfl1</i>    | Cofilin-1                                             | 2.54        |
| O35206                         | <i>Col15a1</i> | Collagen alpha-1(XV) chain                            | 4.22        |
| P31786                         | <i>Dbi</i>     | Acyl-CoA-binding protein                              | 2.79        |
| Q9QZZ6                         | <i>Dpt</i>     | Dermatopontin                                         | 1.49        |
| P04117                         | <i>Fabp4</i>   | Fatty acid-binding protein, adipocyte                 | 4.60        |
| P35505                         | <i>Fah</i>     | Fumarylacetoacetase                                   | 2.95        |
| P11276                         | <i>Fn1</i>     | Fibronectin                                           | 3.06        |
| P10649                         | <i>Gstm1</i>   | Glutathione S-transferase Mu 1                        | 12.10       |
| P97927                         | <i>Lama4</i>   | Laminin subunit alpha-4                               | 4.76        |
| Q61292                         | <i>Lamb2</i>   | Laminin subunit beta-2                                | 2.52        |
| P06151                         | <i>Ldha</i>    | L-lactate dehydrogenase A chain                       | 3.93        |
| P26041                         | <i>Msn</i>     | Moesin                                                | 4.18        |
| Q9CPT4                         | <i>Myd88</i>   | myeloid derived growth factor                         | 1.67        |
| Q922R8                         | <i>Pdia6</i>   | Protein disulfide-isomerase A6                        | 3.45        |
| P62962                         | <i>Pfn1</i>    | Profilin-1                                            | 2.82        |
| P24369                         | <i>Ppib</i>    | Peptidyl-prolyl cis-trans isomerase B                 | 8.63        |
| P35700                         | <i>Prdx1</i>   | Peroxiredoxin-1                                       | 4.29        |
| P99029                         | <i>Prdx5</i>   | Peroxiredoxin-5, mitochondrial                        | 4.46        |
| P62983                         | <i>Rps27a</i>  | Ubiquitin                                             | 2.98        |
| Q9JJU8                         | <i>Sh3bgr1</i> | SH3 domain-binding glutamic acid-rich-like protein    | 5.02        |
| P08228                         | <i>Sod1</i>    | Superoxide dismutase [Cu-Zn]                          | 4.26        |
| O09164                         | <i>Sod3</i>    | Extracellular superoxide dismutase [Cu-Zn]            | 1.39        |
| P82198                         | <i>Tgfb1</i>   | Transforming growth factor-beta-induced protein ig-h3 | 6.22        |
| Q00519                         | <i>Xdh</i>     | Xanthine dehydrogenase/oxidase                        | 2.95        |
| <b>Decreased protein level</b> |                |                                                       |             |
| P03953                         | <i>Cfd</i>     | Complement factor D                                   | 0.569       |
| Q01149                         | <i>Col1a2</i>  | Collagen alpha-2(I) chain                             | 0.751       |
| P21460                         | <i>Cst3</i>    | Cystatin-C                                            | 0.536       |
| P10605                         | <i>Ctsb</i>    | Cathepsin B                                           | 0.713       |
| Q9WUU7                         | <i>Ctsz</i>    | Cathepsin Z                                           | 0.712       |
| P13020                         | <i>Gsn</i>     | Gelsolin                                              | 0.439       |
| Q61646                         | <i>Hp</i>      | Haptoglobin                                           | 0.749       |

Listed proteins are all statistically significant ( $p < 0.05$ ). "Fold change" represents the fold difference in expression between FXR transgenic (aP2-hFXR) and wild-type (WT) mice.



**Supplemental Table S4** Secreted proteins specifically induced by adipocyte-specific FXR overexpression in eWAT of adipocyte-specific FXR overexpressing mice.

| Accession no.                                        | Gene name        | Protein name                                                     | Average H/L ratio |
|------------------------------------------------------|------------------|------------------------------------------------------------------|-------------------|
| <i>only identified in aP2-hFXR-TG adipose tissue</i> |                  |                                                                  |                   |
| Q8BWT1                                               | <i>Acaa2</i>     | 3-ketoacyl-CoA thiolase, mitochondrial                           | 0.064             |
| P51174                                               | <i>Acadl</i>     | Long-chain specific acyl-CoA dehydrogenase, mitochondrial        | 0.052             |
| Q8BNJ2                                               | <i>Adamts4</i>   | A disintegrin and metalloproteinase with thrombospondin motifs 4 | 5.65              |
| P11859                                               | <i>Agt</i>       | Angiotensinogen                                                  | 4.66              |
| P97449                                               | <i>Anpep</i>     | Aminopeptidase N                                                 | 0.189             |
| P28653                                               | <i>Bgn</i>       | Biglycans                                                        | 2.10              |
| Q8R016                                               | <i>Blmh</i>      | Bleomycin hydrolase                                              | 0.054             |
| Q923D2                                               | <i>Blvrb</i>     | Flavin reductase                                                 | 0.221             |
| P14106                                               | <i>C1qb</i>      | Complement C1q subcomponent subunit B                            | 1.78              |
| P27784                                               | <i>Ccl6</i>      | C-C motif chemokine 6                                            | 3.25              |
| P06909                                               | <i>Cfh</i>       | Complement factor H                                              | 2.96              |
| Q9DBP5                                               | <i>Cmpk1</i>     | UMP-CMP kinase                                                   | 0.167             |
| Q80X19                                               | <i>Col14a1</i>   | Collagen alpha-1(XIV) chain                                      | 0.101             |
| P11087                                               | <i>Col1a1</i>    | Collagen alpha-1(I) chain                                        | 8.73              |
| Q3U962                                               | <i>Col5a2</i>    | Collagen alpha-2(V) chain                                        | 8.08              |
| Q04857                                               | <i>Col6a1</i>    | Collagen alpha-1 (VI) chain                                      | 2.88              |
| A6H584                                               | <i>Col6a5</i>    | Collagen alpha-5(VI) chain                                       | 0.054             |
| P97821                                               | <i>Ctsc</i>      | Dipeptidyl peptidase 1 (Cathepsin C)                             | 4.58              |
| P16406                                               | <i>Enpep</i>     | Glutamyl aminopeptidase                                          | 0.216             |
| Q9WVH9                                               | <i>Fbln5</i>     | Fibulin-5                                                        | 0.054             |
| Q8VCM7                                               | <i>Fgg</i>       | Fibrinogen gamma chain                                           | 0.047             |
| P13707                                               | <i>Gpd1</i>      | Glycerol-3-phosphate dehydrogenase [NAD+], cytoplasmic           | 0.066             |
| P46412                                               | <i>Gpx3</i>      | Glutathione peroxidase 3                                         | 0.049             |
| P28798                                               | <i>Grn</i>       | Granulins                                                        | 2.53              |
| Q99LP6                                               | <i>Grpel1</i>    | GrpE protein homolog 1, mitochondrial                            | 0.091             |
| O09131                                               | <i>Gsto1</i>     | Glutathione S-transferase omega-1                                | 0.317             |
| Q9WVLO                                               | <i>Gstz1</i>     | Maleylacetoacetate isomerase                                     | 0.038             |
| Q88844                                               | <i>ldh1</i>      | Isocitrate dehydrogenase [NADP]                                  | 0.106             |
| P11438                                               | <i>Lamp1</i>     | Lysosome-associated membrane glycoprotein 1                      | 0.111             |
| P11672                                               | <i>Lcn2</i>      | Neutrophil gelatinase-associated lipocalin                       | 3.65              |
| Q61233                                               | <i>Lcp1</i>      | Plastin-2                                                        | 0.070             |
| P24527                                               | <i>Lta4h</i>     | Leukotriene A-4 hydrolase                                        | 0.138             |
| P27046                                               | <i>Man2a1</i>    | Alpha-mannosidase 2                                              | 0.744             |
| P33434                                               | <i>Mmp2</i>      | 72 kDa type IV collagenase                                       | 6.32              |
| P09103                                               | <i>P4hb</i>      | Protein disulfide-isomerase                                      | 0.047             |
| Q99LX0                                               | <i>Park7</i>     | Protein DJ-1                                                     | 0.174             |
| P30412                                               | <i>Ppic</i>      | Peptidyl-prolyl cis-trans isomerase C                            | 0.127             |
| Q91VI7                                               | <i>Rnh1</i>      | Ribonuclease inhibitor                                           | 0.342             |
| Q9QUR8                                               | <i>Sema7a</i>    | Semaphorin-7A                                                    | 2.82              |
| P07758                                               | <i>Serpina1a</i> | Alpha-1-antitrypsin 1-1                                          | 0.035             |
| Q00896                                               | <i>Serpina1c</i> | Alpha-1-antitrypsin 1-3                                          | 0.058             |
| O88968                                               | <i>Tcn2</i>      | Transcobalamin-2                                                 | 3.90              |
| P21981                                               | <i>Tgm2</i>      | Protein-glutamine gamma-glutamyltransferase 2                    | 0.039             |
| P63028                                               | <i>Tpt1</i>      | Translationally-controlled tumor protein                         | 0.302             |
| Q88342                                               | <i>Wdr1</i>      | WD repeat-containing protein 1                                   | 0.168             |

“Average H/L ratio” represents the average heavy/light ratio of the particular protein in the secretome of epididymal WAT of FXR transgenic (aP2-hFXR) mice and is directly related to the protein synthesis rate of that protein.

**Supplemental Table S5** Expression levels of inflammatory markers  
in eWAT and liver of FXR<sup>-/-</sup> aP2-hFXR and Crown-like structure abundance

| Gene name                                                | Fold change<br>(SEM) |
|----------------------------------------------------------|----------------------|
| <b>eWAT</b>                                              |                      |
| Chow                                                     |                      |
| <i>Tnfq</i>                                              | 1.24 (0.49)          |
| <i>Mcp-1</i>                                             | 1.10 (0.40)          |
| <i>Il10</i>                                              | 1.15 (0.55)          |
| HFD (3 months)                                           |                      |
| <i>Cc68</i>                                              | 0.76 (0.35)          |
| <i>Tnfq</i>                                              | 1.51 (0.02)          |
| <i>Mcp-1</i>                                             | 1.16 (0.48)          |
| <i>IL10</i>                                              | 1.29 (0.25)          |
| <b>Liver</b>                                             |                      |
| Chow                                                     |                      |
| <i>Cd68</i>                                              | 1.49 (0.36)          |
| <i>Tnfq</i>                                              | 1.14 (0.20)          |
| <i>Mcp-1</i>                                             | 1.51 (0.26)          |
| <i>IL10</i>                                              | 1.15 (0.57)          |
| HFD (3 months)                                           |                      |
| <i>Tnfq</i>                                              | 0.72(0.42)           |
| <i>Mcp-1</i>                                             | 1.58 (0.26)          |
| <i>Il10</i>                                              | 1.17 (0.57)          |
| <b>CLS abundance<br/>(chow)<br/>(CLS/mm<sup>2</sup>)</b> | 2,25 (0.95)*         |

Relative expression level of inflammatory markers in eWAT and Liver of FXR<sup>-/-</sup> aP2-hFXR compared to FXR<sup>-/-</sup> mice (N=5-6). \* Crown-like structure abundance was not different between groups (N=5), however a single sample (5,9-fold) had a large impact (1,32-fold average without outlier).
